# Supplementary material for: Highly sensitive and selective detection of silver(i) in aqueous solution with silver(i)-specific DNA and Sybr green I
Source: Royal Society of Chemistry journal article supplement (doi:10.1039/c3an36496h), 2013-01-01
Supplement: c3an36496h.pdf [file c3an36496h.pdf]

## Supporting information

### Highly Sensitive and Selective Detection of Silver (I) in Aqueous Solution with Silver(I)-specific DNA and Sybr Green I

Qing Yang,<sup>a,b</sup> Fan Li,<sup>a</sup> Yan Huang,<sup>a</sup> Hui Xu,<sup>\*c</sup> Linsheng Tang,<sup>\*b</sup> Lihua Wang,<sup>a</sup> Chunhai Fan<sup>a</sup>

#### Experimental Section

SG (10000×) was purchased from invitrogen inc. When in use, it was diluted to 250× with DMSO, then to  $10 \times (1.96 \times 10^{-6} \text{ M})$  with water to make a stock solution.  $1.625 \times 10^{-8} \text{ M}$  SSO was first incubated for 15 min with different amount of  $\text{Ag}^+$  in 10  $\mu\text{L}$  of 100 mM MOPS buffer containing 500 mM  $\text{NaNO}_3$ , pH 6.90 and one amount of MilliQ– $\text{H}_2\text{O}$  to 100  $\mu\text{L}$  reaction solution. Then 5  $\mu\text{L}$  of 10×SG was added to the solution. After incubating for 2 min, the mixture was added one amount MilliQ– $\text{H}_2\text{O}$  to 800  $\mu\text{L}$  detection solution and used for the fluorescence study at ex497nm.

To study the quenching of  $\text{Ag}^+$ ,  $\text{Cu}^{2+}$  and  $\text{Hg}^{2+}$  to SG, 2  $\mu\text{L}$   $\text{Ag}^+$  (10 mM),  $\text{Cu}^{2+}$  (10 mM) and  $\text{Hg}^{2+}$  (10 mM) were respectively added into 10  $\mu\text{L}$  SG (100×) for fluorescence study. The fluorescence spectra were shown in Fig. S1, indicating that metal ions such as  $\text{Ag}^+$ ,  $\text{Cu}^{2+}$  and  $\text{Hg}^{2+}$  could quench the fluorescence of SG.

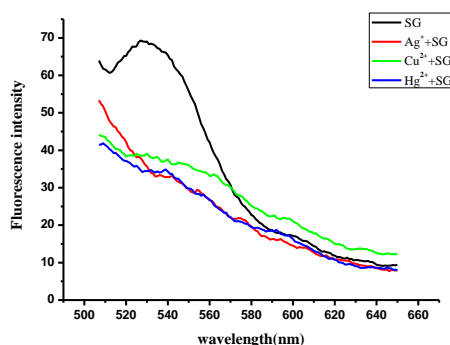

**Fig. S1** The quenching of  $\text{Ag}^+$ ,  $\text{Cu}^{2+}$  and  $\text{Hg}^{2+}$  to SG

We used SG-SSO as a probe and illustrated the formation of  $\text{Ag}^+$ -hairpin structure by measuring fluorescence intensity at 530 nm every minute. As shown in Fig. S2, the  $\text{Ag}^+$ -hairpin structure forms immediately once the silver ion is added.

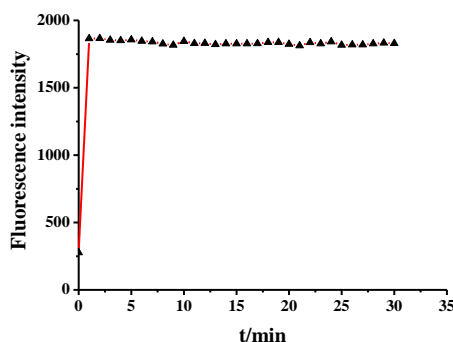

**Fig. S2** Fluorescence intensity change against time after adding  $\text{Ag}^+$  into SG–SSO.

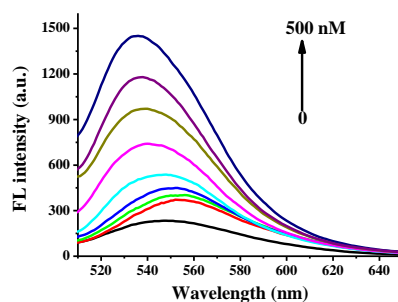

**Fig. S3** The fluorescence spectra of solutions containing SSO with different concentration of  $\text{Ag}^+$  (0, 1, 5, 10, 30, 50, 80, 100, 500 nM)  $[\text{SSO}] = 1.625 \times 10^{-8} \text{ M}$  and  $[\text{SG}] = 1.225 \times 10^{-7} \text{ M}$ . A buffer of 100 mM MOPS, 500 mM  $\text{NaNO}_3$ , pH 6.90 was used.

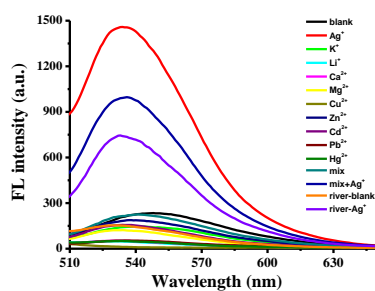

**Fig. S4** The fluorescence spectra of SSO in the absence or presence of 500 nM  $\text{Ag}^+$ , 20 mM  $\text{K}^+$ , 50 mM  $\text{Na}^+$ , 100 mM  $\text{Li}^+$ , 10 mM  $\text{Ca}^{2+}$ , 10 mM  $\text{Mg}^{2+}$ , 100  $\mu\text{M}$   $\text{Cu}^{2+}$ , 100  $\mu\text{M}$   $\text{Zn}^{2+}$ , 100  $\mu\text{M}$   $\text{Cd}^{2+}$ , 100  $\mu\text{M}$   $\text{Pb}^{2+}$ , 100  $\mu\text{M}$   $\text{Hg}^{2+}$ , respectively.  $[\text{SSO}] = 1.625 \times 10^{-8} \text{ M}$  and  $[\text{SG}] = 1.225 \times 10^{-7} \text{ M}$ . Mixed sample ( $\text{K}^+$ ,  $\text{Na}^+$ ,  $\text{Li}^+$ ,  $\text{Ca}^{2+}$ ,  $\text{Mg}^{2+}$ ,  $\text{Cu}^{2+}$ ,  $\text{Zn}^{2+}$ ,  $\text{Cd}^{2+}$  and  $\text{Pb}^{2+}$ , each 1  $\mu\text{M}$ ) and real sample (river water) in the absence or presence of  $\text{Ag}^+$  (500 nM) were detected.

Table S1 Comparison between the current method and other methods by using  
C–Ag<sup>+</sup>–C interaction

| Methods                                                         | Linear range  | LOD    | Ref.         |
|-----------------------------------------------------------------|---------------|--------|--------------|
| A graphene-based fluorescent nanoprobe for silver(I) ions       | Not indicated | 5 nM   | a            |
| Un-labeled C-rich ssDNA probe and controlled assembly of MWCNTs | 10 to 500 nM  | 1.3 nM | b            |
| Oligonucleotide-immobilized oscillator                          | Not indicated | 10 nM  | c            |
| Oligonucleotide-based fluorogenic probe                         | 50 to 700 nM  | 32 nM  | d            |
| Nucleic acid functionalized CdSe/ZnS quantum dots               | Not indicated | 1 μM   | e            |
| DNA SWCNT-based fluorescent sensor                              | 0–150 nM      | 1 nM   | f            |
| Light scattering technique of DNA-functionalized AuNPs          | 200-9000 nM   | 50 nM  | g            |
| Silver(I)-specific DNA and Sybr Green I                         | 1nM to 100 nM | 1nM    | Current work |

a Y. Q. Wen, F. F. Xing, S. J. He, S. P. Song, L. H. Wang, Y. T. Long, D. Li and C. H. Fan, *Chem. Commun.*, 2010, **46**, 2596.

b G. P. Yan, Y. H. Wang, X. X. He, K. M. Wang, J. Su, Z. F. Chen and Z. H. Qing, *Talanta*, 2012, **94**, 178.

c A. Ono, S. Cao, H. Togashi, M. Tashiro, T. Fujimoto, T. Machinami, S. Oda, Y. Miyake, I. Okamoto and Y. Tanaka, *Chem. Commun.*, 2008, **39**, 4825.

d Y. H. Lin and W. L. Tseng, *Chem. Commun.*, 2009, 6619.

e R. Freeman, T. Finder and Itamar Willner, *Angew. Chem.*, 2009, **121**, 7958.

f C. Zhao, K. G. Qu, Y. J. Song, C. Xu, J. S. Ren and X. G. Qu, *Chem. Eur. J.*, 2010, **16**, 8147.

g D. Q. Feng, G. L. Liu, W. J. Zheng, J. Liu, T. F. Chen and D. Li, *Chem. Commun.*, 2011, **47**, 8557.
